# Supplementary figures and images for: Investigation into the effect of Si doping on the performance of Sr1−yCayMnO3−δ SOFC cathode materials
Source: Royal Society of Chemistry journal article supplement (doi:10.1039/c3dt32561j), 2013-01-01

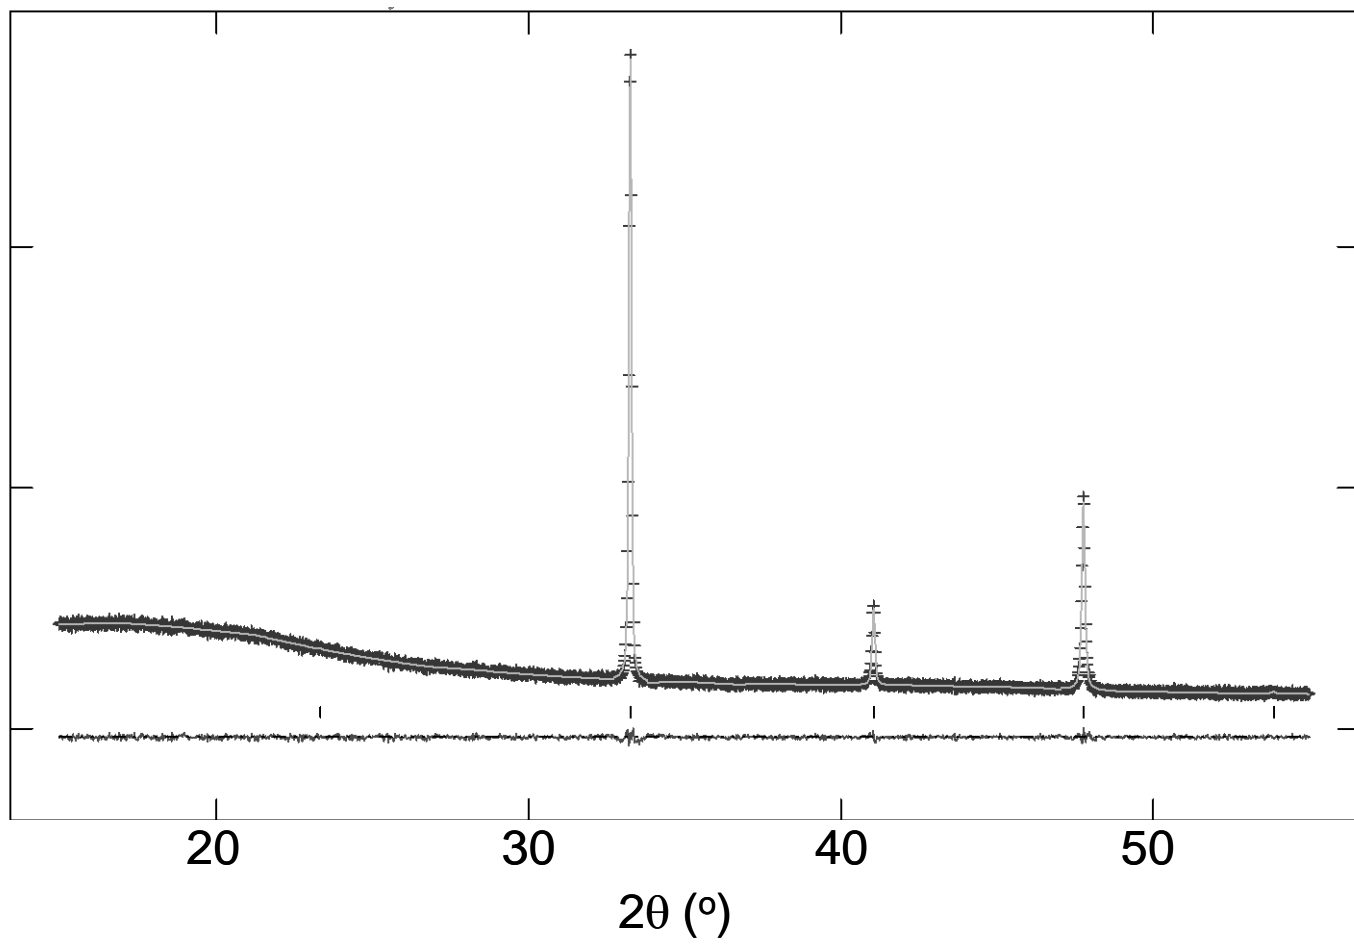

**Figure S1**

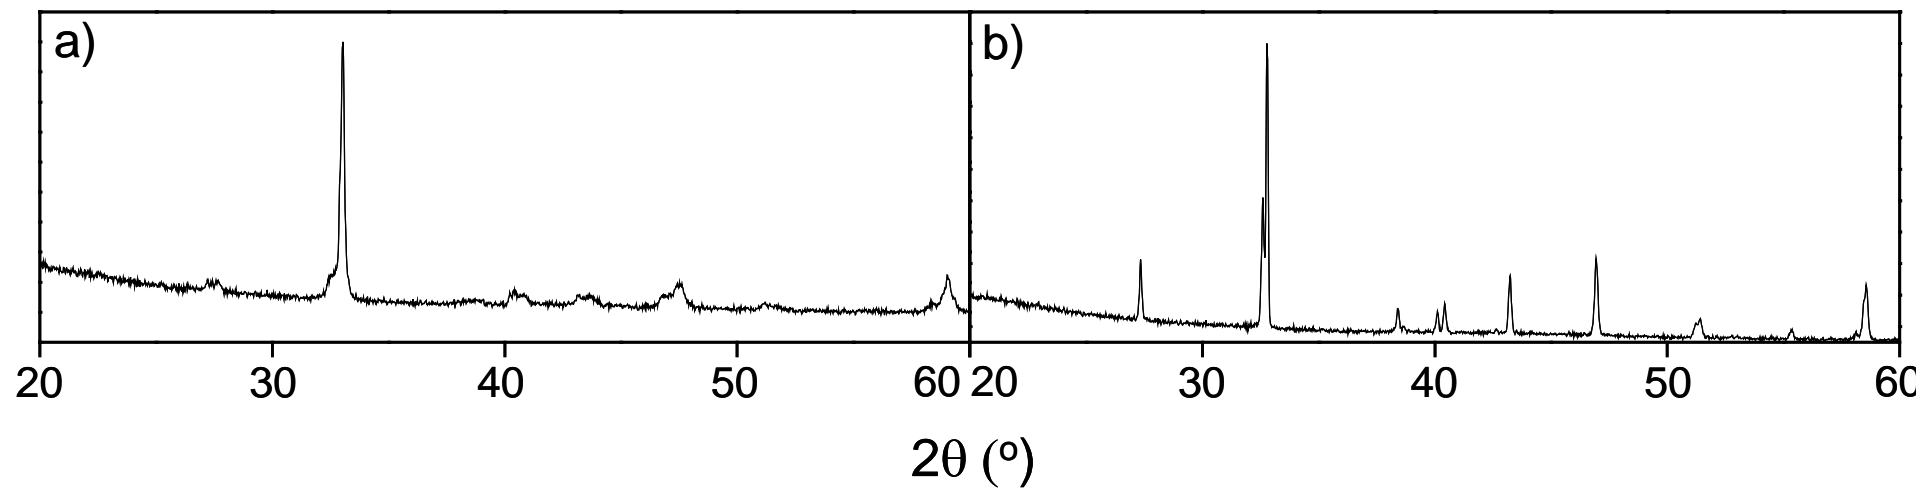

**Figure S2**

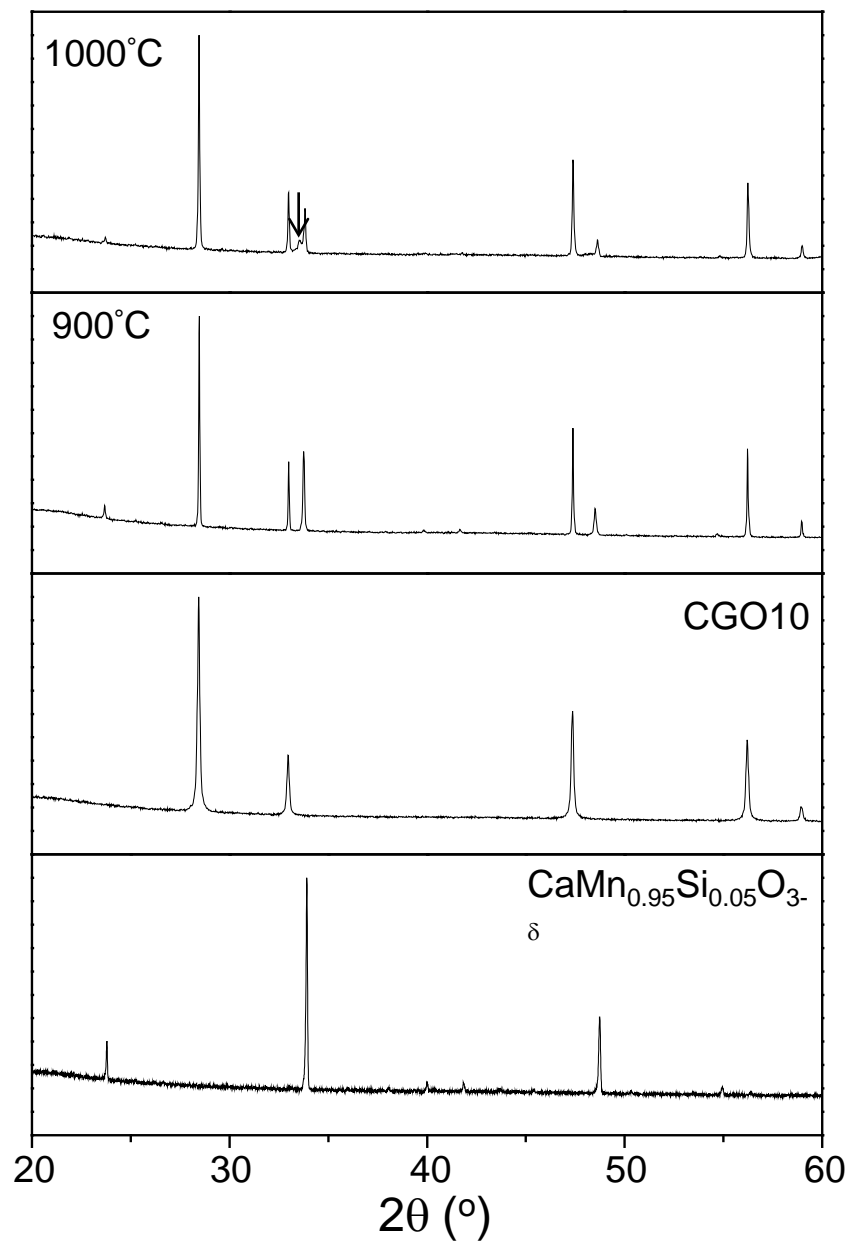

**Figure S3**

Supplement: c3dt32561j.pdf [file c3dt32561j.pdf]
